# Supplementary material
Source: PubMed Central journal article supplement (PMC4980555)
Supplement: mmc1.pdf [file mmc1.pdf]

## Exhaled Nitric Oxide Levels Among Adults With Excessive Alcohol Consumption

*Majid Afshar, MD, MSCR; Jill A. Poole, MD; Guichan Cao, MS; Ramon Durazo, PhD; Richard C. Cooper, MD; Elizabeth J. Kovacs, PhD; and Joseph H. Sisson, MD*

CHEST 2016; 150(1):196-209

*Online supplements are not copyedited prior to posting and the author(s) take full responsibility for the accuracy of all data.*

© 2016 AMERICAN COLLEGE OF CHEST PHYSICIANS. Reproduction of this article is prohibited without written permission from the American College of Chest Physicians. See online for more details. DOI: 10.1016/j.chest.2016.02.642

**e-Table 1.** Comparison of missing data to study population from the NHANES, 2007-2012 in adults aged  $\geq 21$  years.

| Baseline Characteristics        | Study Population<br>(12,059) | Missing Cohort*<br>(3,442) | p-value |
|---------------------------------|------------------------------|----------------------------|---------|
| Age, year, (SEM)                | 45.98 (0.34)                 | 47.35 (0.40)               | 0.002   |
| Height, cm, (SEM)               | 169.61 (0.13)                | 166.54 (0.33)              | <0.001  |
| BMI, %, (SEM)                   |                              |                            |         |
| Underweight                     | 157 (1.30)                   | 83 (2.83)                  |         |
| Normal Weight                   | 3283 (28.98)                 | 842 (28.00)                |         |
| Overweight                      | 4059 (34.01)                 | 1049 (32.64)               |         |
| Obesity Class I                 | 2566 (20.63)                 | 714 (20.07)                | 0.003   |
| Obesity Class II                | 1153 (8.68)                  | 329 (10.20)                |         |
| Obesity Class III               | 841 (6.40)                   | 236 (6.25)                 |         |
| Female, n (%)                   | 5807 (49.11)                 | 2020 (58.75)               | <0.001  |
| Race n, (%)                     |                              |                            |         |
| Non-Hispanic White              | 5462 (70.26)                 | 1100 (54.76)               |         |
| Non-Hispanic Black              | 2565 (10.61)                 | 873 (15.78)                | <0.001  |
| Mexican-American                | 3079 (12.93)                 | 1056 (18.61)               |         |
| Other Race/Ethnicity            | 953 (7.56)                   | 413 (10.85)                |         |
| Asthma n, (%)                   | 915 (7.56)                   | 330 (8.79)                 | 0.060   |
| Smoker status, n, (%)           |                              |                            |         |
| Never                           | 2813 (22.10)                 | 731 (21.69)                |         |
| Current                         | 2891 (24.62)                 | 707 (20.40)                | <0.001  |
| Former                          | 6355 (53.27)                 | 1992 (57.91)               |         |
| URI                             | 2426 (17.82)                 | 271 (20.29)                | 0.181   |
| Alcohol related liver disease   | 559 (4.54)                   | 72 (2.03)                  | <0.001  |
| NO-rich veg diet                | 500 (4.63)                   | 59 (6.38)                  | 0.143   |
| NO-rich meat diet               | 413 (3.65)                   | 41 (3.18)                  | 0.424   |
| Education, n, (%)               |                              |                            |         |
| 12 yrs.                         | 2937 (16.16)                 | 1336 (27.83)               |         |
| <12 yrs.                        | 2767 (22.44)                 | 761 (23.12)                | <0.001  |
| $\geq 12$ yrs.                  | 6355 (61.40)                 | 1345 (49.05)               |         |
| Poverty Income Ratio <1, n (%)  | 3217 (18.55)                 | 1400 (33.01)               | <0.001  |
| Inhaled steroid use, n, (%)     | 268 (2.30)                   | 132 (3.20)                 | 0.010   |
| Oral corticosteroid use, n, (%) | 121 (0.89)                   | 58 (1.45)                  | 0.037   |
| Hay fever, n, (%)               | 1904 (18.29)                 | 455 (15.49)                | 0.008   |

\*Missing cohort comprised of missing demographic and questionnaire data (N=1788) and missing FeNO data (N=1654). BMI= body mass index; SEM= standard error of the mean; URI = upper respiratory illness in last 7 days; Age= Group 1 female is 21-45 years and male is 21-59 years. Group 2 female is 46-79 and male is 60-79.

**e-Table 2.** Coefficient from Multivariable Linear Regression for primary outcome of FeNO levels and secondary outcomes of blood eosinophils and CRP in Asthma Participants

| Variables               | Ln FeNO<br>(95% CI)<br>(n=911) |         | Blood Eosinophil<br>(95% CI)<br>(n=887) |         | CRP*<br>(95% CI)<br>(n=590) |         |
|-------------------------|--------------------------------|---------|-----------------------------------------|---------|-----------------------------|---------|
|                         |                                | p-value |                                         | p-value |                             | p-value |
| Age (group)             |                                |         |                                         |         |                             |         |
| Group 1                 | referent                       |         | referent                                |         | referent                    |         |
| Group 2                 | 0.04 (-0.09, 0.18)             | 0.529   | 0.00 (-0.04, 0.04)                      | 0.918   | 0.07 (-0.07, 0.21)          | 0.333   |
| Height (per 10cm)       | 0.12 (0.04, 0.21)              | 0.007   | -0.02 (-0.05, 0.00)                     | 0.099   | -0.02 (-0.15, 0.12)         | 0.814   |
| BMI                     |                                |         |                                         |         |                             |         |
| Normal                  | referent                       |         | referent                                |         | referent                    |         |
| Underweight             | -0.10 (-0.70, 0.50)            | 0.743   | 0.25 (0.03-0.46)                        | 0.024   | -0.07 (-0.30, 0.17)         | 0.578   |
| Overweight              | 0.12 (-0.07, 0.32)             | 0.200   | 0.04 (-0.01, 0.09)                      | 0.122   | 0.11 (-0.08, 0.29)          | 0.257   |
| Obesity Class I         | 0.12 (-0.05, 0.30)             | 0.169   | 0.02 (-0.03, 0.07)                      | 0.465   | 0.35 (0.14, 0.56)           | 0.002   |
| Obesity Class II        | 0.02 (-0.18, 0.21)             | 0.846   | 0.02 (-0.02, 0.07)                      | 0.283   | 0.44 (0.23, 0.66)           | <0.001  |
| Obesity Class III       | 0.13 (-0.08, 0.35)             | 0.223   | 0.07 (0.01, 0.13)                       | 0.024   | 0.77 (0.45, 1.10)           | <0.001  |
| Sex                     |                                |         |                                         |         |                             |         |
| Male                    | referent                       |         | referent                                |         | referent                    |         |
| Female                  | -0.01 (-0.17, 0.16)            | 0.936   | -0.05 (-0.09, -0.02)                    | 0.007   | 0.17 (-0.02, 0.36)          | 0.074   |
| Race                    |                                |         |                                         |         |                             |         |
| Non-Hispanic White      | referent                       |         | referent                                |         | referent                    |         |
| Non-Hispanic Black      | -0.17 (-0.32, -0.03)           | 0.022   | -0.03 (-0.06, 0.01)                     | .101    | 0.07 (-0.11, 0.26)          | 0.418   |
| Hispanic                | 0.24 (0.10, 0.39)              | 0.002   | 0.01 (-0.04, 0.05)                      | 0.761   | 0.18 (-0.10, 0.46)          | 0.198   |
| Other Race/Ethnicity    | -0.10 (-0.30, 0.09)            | 0.296   | -0.04 (-0.08, 0.00)                     | 0.083   | -0.01 (-0.15, 0.13)         | 0.922   |
| Average Cig/Day         |                                |         |                                         |         |                             |         |
| 0                       | referent                       |         | referent                                |         | referent                    |         |
| 1-10                    | -0.43 (-0.59, -0.26)           | <0.001  | 0.03 (-0.01, 0.07)                      | 0.168   | 0.05 (-0.13, 0.24)          | 0.057   |
| 11-20                   | -0.78 (-0.98, -0.58)           | <0.001  | 0.07 (0.01, 0.13)                       | 0.027   | 0.11 (0.00, 0.22)           | 0.177   |
| >20                     | -0.88 (-1.20, -0.56)           | <0.001  | 0.03 (-0.01, 0.07)                      | 0.198   | 0.16 (-0.08, 0.41)          | 0.814   |
| Education               |                                |         |                                         |         |                             |         |
| 12 years                | referent                       |         | referent                                |         | referent                    |         |
| ≤12 years               | -0.03 (-0.22, 0.16)            | 0.733   | -0.01 (-0.04, 0.02)                     | 0.627   | -0.06 (-0.19, 0.08)         | 0.414   |
| >12 years               | 0.12 (-0.03, 0.27)             | 0.109   | 0.00 (-0.04, 0.04)                      | 0.877   | -0.01 (-0.15, 0.13)         | 0.897   |
| Poverty Income Ratio <1 |                                |         |                                         |         |                             |         |
| No                      | referent                       |         | referent                                |         | referent                    |         |
| Yes                     | -0.05 (-0.17, 0.07)            | 0.396   | 0.01 (-0.02, 0.04)                      | 0.675   | -0.06 (-0.18, 0.06)         | 0.329   |
| Inhaled Steroid Use     |                                |         |                                         |         |                             |         |
| No                      | referent                       |         | referent                                |         | referent                    |         |
| Yes                     | 0.02 (-0.12, 0.15)             | 0.810   | 0.06 (0.01, 0.11)                       | 0.028   | 0.07 (-0.09, 0.23)          | 0.371   |
| Ate Nitrogen Rich Veg   |                                |         |                                         |         |                             |         |
| No                      | referent                       |         | referent                                |         | referent                    |         |
| Yes                     | 0.50 (0.26-0.73)               | <0.001  | 0.04 (-0.02, 0.10)                      | 0.192   | -0.13 (-0.38, -0.04)        | 0.020   |
| Hay fever               |                                |         |                                         |         |                             |         |
| No                      | referent                       |         | referent                                |         | referent                    |         |
| Yes                     | 0.18 (0.05, 0.30)              | 0.009   | 0.02 (-0.01, 0.05)                      | 0.246   | 0.04 (-0.11, 0.18)          | 0.630   |
| Alcohol Liver Disease   |                                |         |                                         |         |                             |         |
| No                      | referent                       |         | referent                                |         | referent                    |         |
| Yes                     | 0.07 (-0.20, 0.34)             | 0.603   | 0.00 (-0.05, 0.05)                      | 0.984   | -0.13 (-0.36, 0.10)         | 0.272   |
| Alcohol Category        |                                |         |                                         |         |                             |         |
| Never Drinker           | referent                       |         | referent                                |         | referent                    |         |
| Non-excessive           | 0.09 (-0.07, 0.26)             | 0.267   | 0.02 (-0.01, 0.06)                      | 0.169   | -0.09 (-0.30, 0.11)         | 0.377   |
| Excessive               | 0.02 (-0.18, 0.21)             | 0.877   | 0.02 (-0.02, 0.07)                      | 0.289   | 0.10 (-0.18, 0.38)          | 0.488   |
| Former Excessive        | 0.30 (0.02, 0.58)              | 0.033   | -0.01 (-0.07, 0.06)                     | 0.876   | 0.13 (-0.26, 0.51)          | 0.513   |

Age= Group 1 female is 21-45 years and male is 21-59 years. Group 2 female is 46-79 and male is 60-79. Coefficients are expressed as change in ln (FeNO) per 1 unit change in the independent variable. BMI = body mass index; FeNO= fractional excretion nitric oxide; Blood eosinophils expressed as cells/mm<sup>3</sup>. CRP = C-reactive protein in ng/mL. \*Data available from 2007-2010.
